# Supplementary material for: Impaired Peripheral Endothelial Function Assessed by Digital Reactive Hyperemia Peripheral Arterial Tonometry and Risk of In‐Stent Restenosis
Source: PubMed Central journal article supplement — J Am Heart Assoc. 2016 Jun 17;5(6):e003202. doi: 10.1161/JAHA.116.003202 (PMC4937265; doi:10.1161/jaha.116.003202), 2016-06-17

**SUPPLEMENTAL MATERIAL**

**Figure Legend:**

**Figure S1.** RHI and ISR. RHI in ISR and non-ISR patients at (A) index percutaneous coronary intervention and (B) F/U. Bars represent averages of the RHI in each group; error bars indicate one standard deviation. F/U=follow-up; ISR=in-stent restenosis; RHI = reactive hyperemia-peripheral arterial tonometry index.

A

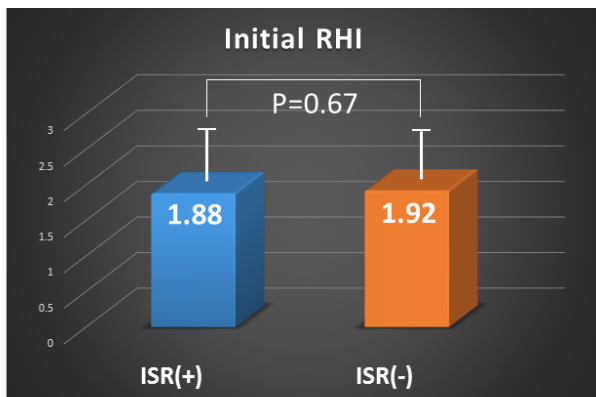

B

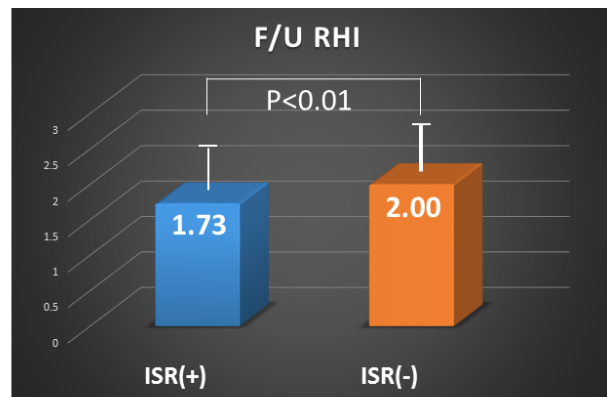

Supplement: JAH3-5-e003202-s001.pdf [file JAH3-5-e003202-s001.pdf]
